# Supplementary material
Source: PubMed Central journal article supplement (PMC3906844)
Supplement: NIHMS495531-supplement-1.pdf [file NIHMS495531-supplement-1.pdf]

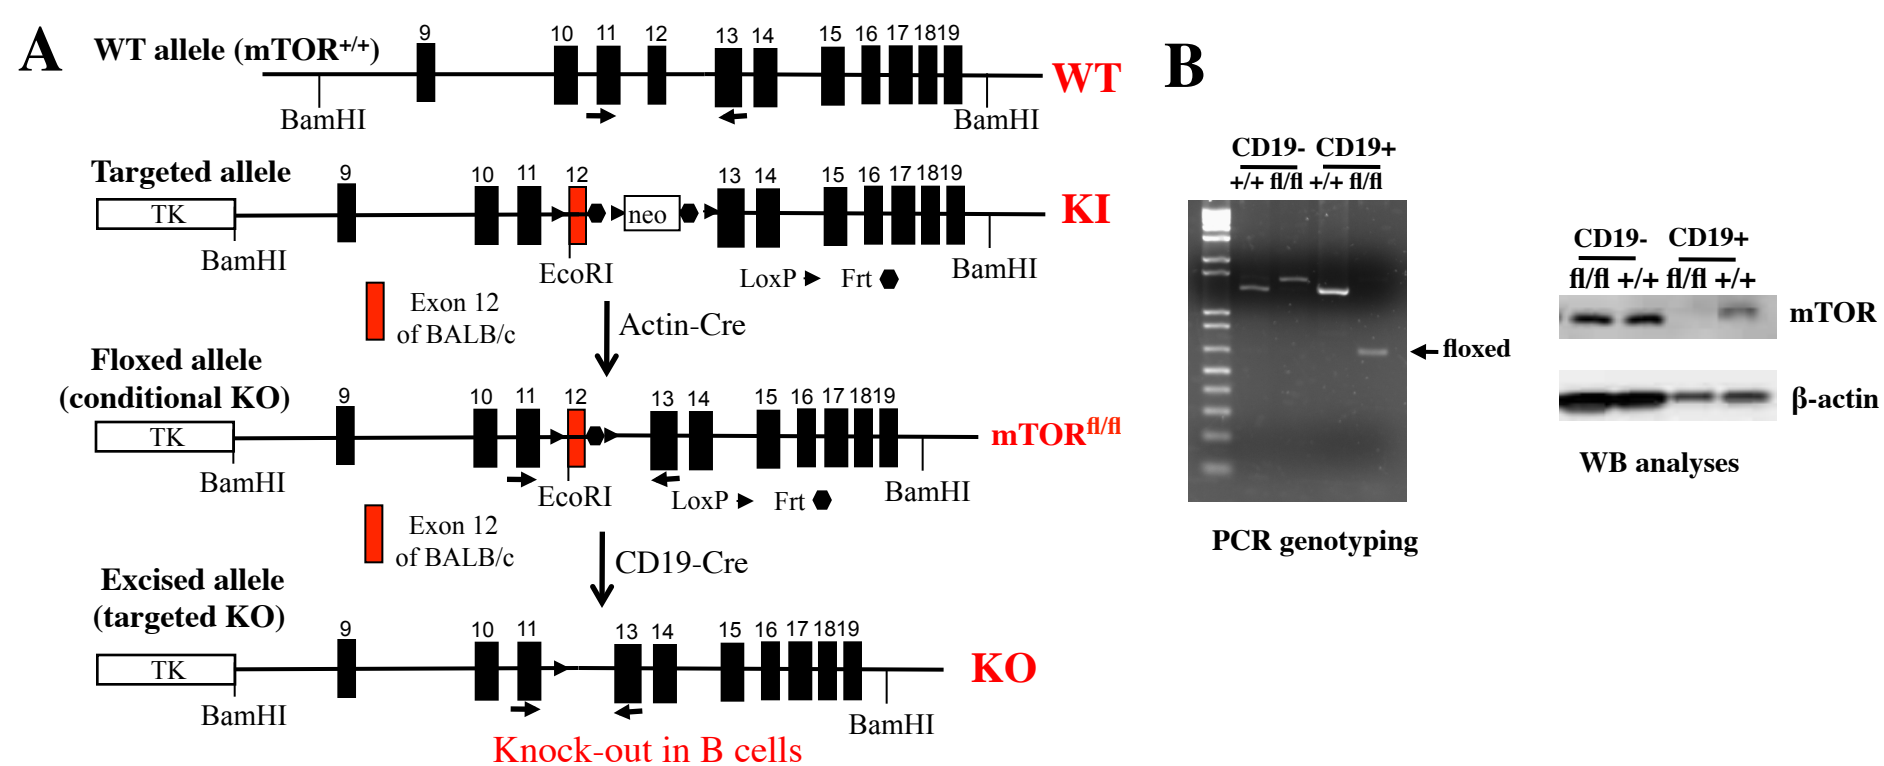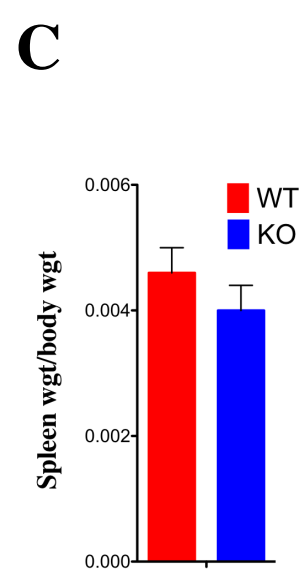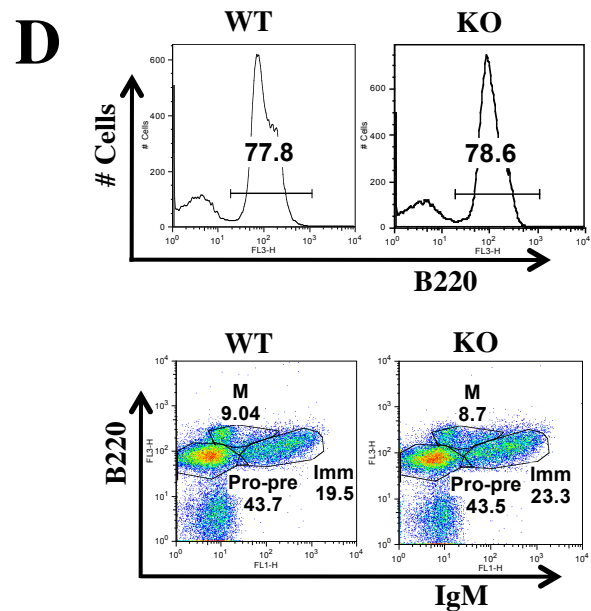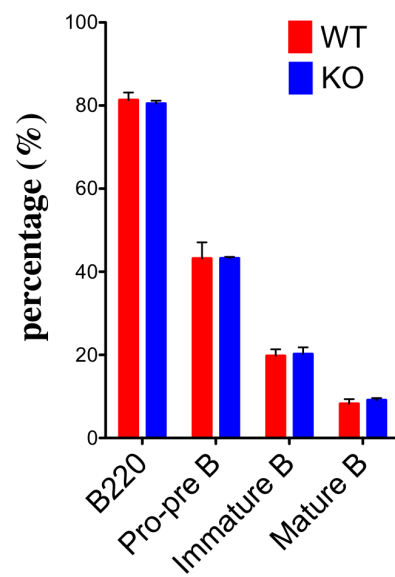

**Figure S1. Strategy for generating mTOR conditional knockout mice with CD19<sup>Cre</sup>.**

**A)** The strategy used to generate Cre-mediated mTOR deletion in CD19<sup>+</sup> B cells.

Schematic diagram of wild-type (WT), knock-in (KI) mTOR (targeting allele), floxed and excised alleles after Cre recombination of the mTOR gene. **B)** PCR and Western

Blot analyses of floxed (fl) and wild-type (+) mTOR in CD19<sup>-</sup> and CD19<sup>+</sup> cells from mTOR<sup>+/+</sup> CD19<sup>Cre/+</sup> (WT) and mTOR<sup>fl/fl</sup> CD19<sup>Cre/+</sup> (KO) mice. **C, D)** mTOR conditional

knockout in CD19<sup>+</sup> B cells did not alter the **C)** relative weight of spleen to body weight, or the **D)** development of B cells in bone marrow (BM). The age of mice ranged from 8

to 12 weeks (n=10). Data are presented as mean  $\pm$  SEM. Cells from BM of WT and KO mice **D)** were stained with antibodies to B220, IgM, and IgD. Sub-populations of B cells

were analyzed by FACS and FlowJo (M: mature B cell; Pro-pre: pro- and pre-B cells;

Imm: immature B cells). Data (n=6) are presented as mean  $\pm$  SEM.

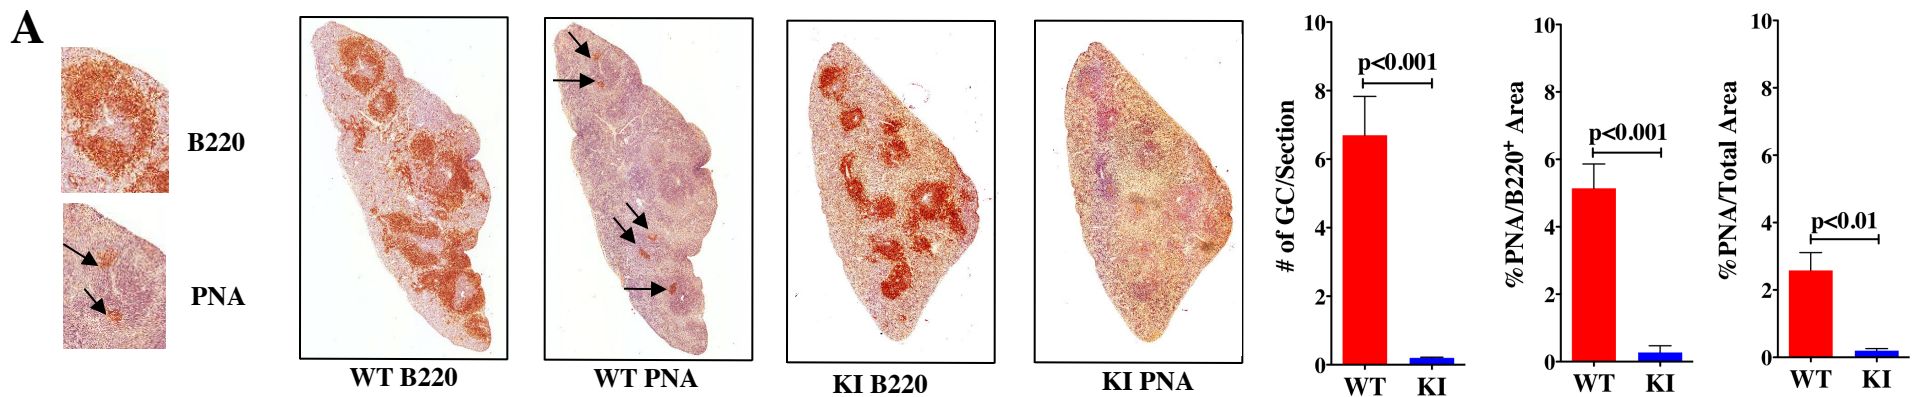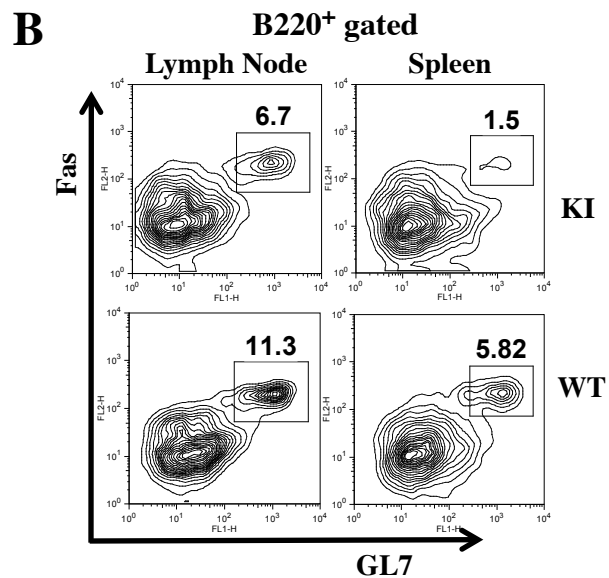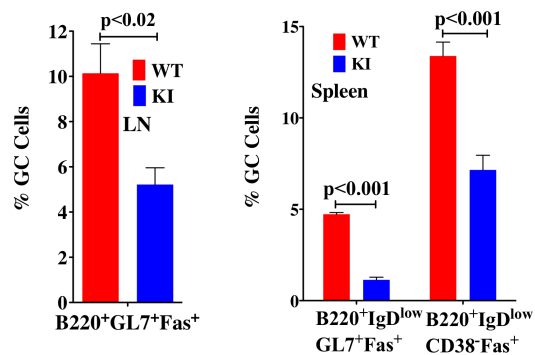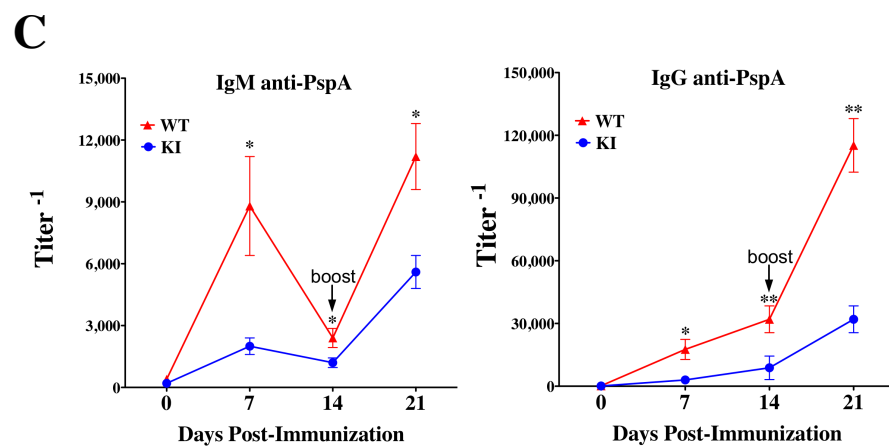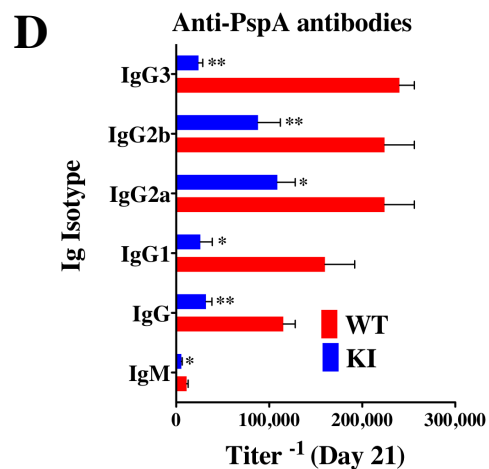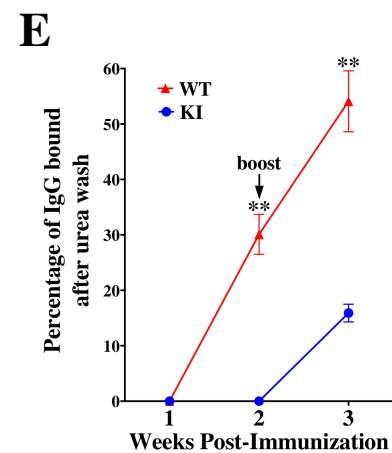

**Figure S2. Constitutive reductions in mTOR impair GC formation and antibody responses to intact *Streptococcus pneumoniae* Pn14.** mTOR-compromised KI and WT mice (N=5/group) were immunized i.p. with  $2 \times 10^8$  CFU/mouse heat-killed Pn14 in saline and boosted on day 14. Spleens and lymph nodes (LN) were collected 21 days post-immunization for IHC staining and FACS analysis. **A)** The numbers of GCs, the area of PNA staining and the area of B220+ staining were evaluated from scans of spleen sections (N =5) stained with B220 or PNA using color deconvolution analysis software (Aperio Technologies). **B)** Cells from LNs and spleens were stained with B220, GL7, Fas, CD38, and IgD antibodies and analyzed by FACS. Data are presented as mean  $\pm$ SEM; p-values are indicated. **C)** KI and WT (N = 5/group) mice were immunized intraperitoneally with  $2 \times 10^8$  CFU/mouse equivalents of heat-killed Pn14 in saline and boosted on day 14. KI mice had decreased anti-protein (PspA) responses to intact Pn14, relative to WT littermate controls. **D)** Antigen-specific IgM and IgG isotype titers were determined from sera collected at the indicated days. Data are presented as mean  $\pm$  SEM; \*significance  $p < 0.05$ ; \*\*significance  $p < 0.01$ . **E)** Affinity maturation of antibodies in response to primary and secondary challenge with Pn14 was impaired in KI mice. The percent of anti-PspA IgG antibody bound after urea wash (to measure avidity) from d21 sera of KI and WT mice (N = 5/group) is shown. Data are presented as mean  $\pm$  SEM; \*\*significance  $p < 0.01$ .

**A**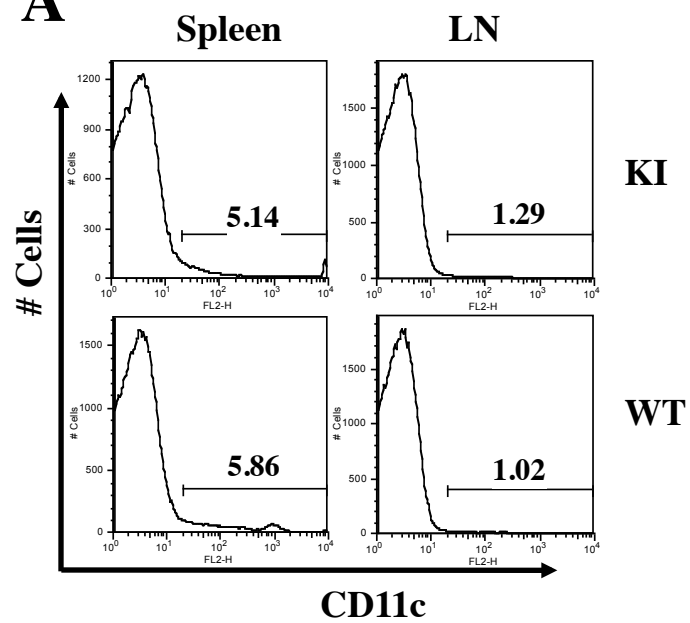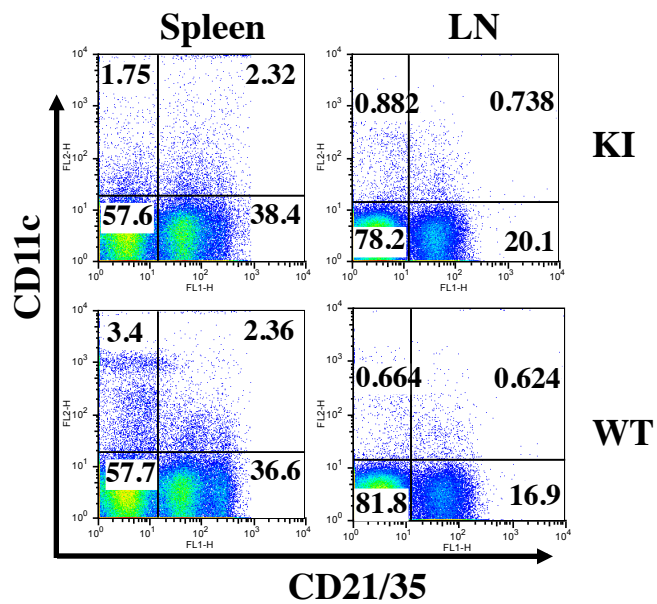**B**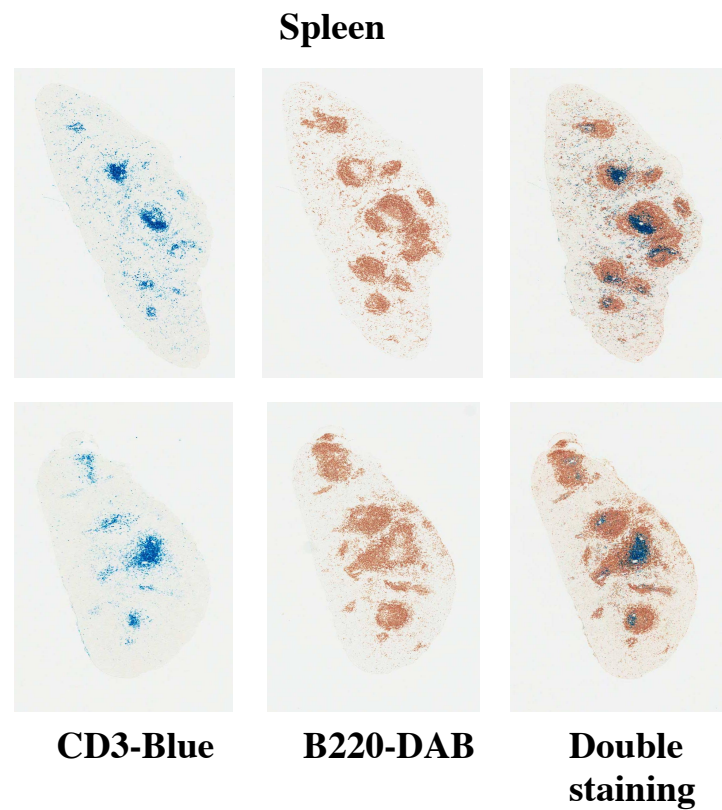

**Figure S3. Immunohistochemical stains of spleens and lymph nodes of mTOR KI mice.** **A)** Splenic and LN cells isolated from WT and KI mice (N=2/grp) were stained with CD11c and CD21/35 antibodies; CD11c<sup>+</sup> and CD21/35<sup>+</sup> cells were analyzed by FACS with FlowJo. **B)** Representative splenic sections from WT and KI mice (N = 5/group) stained with B220 and CD3 antibodies.

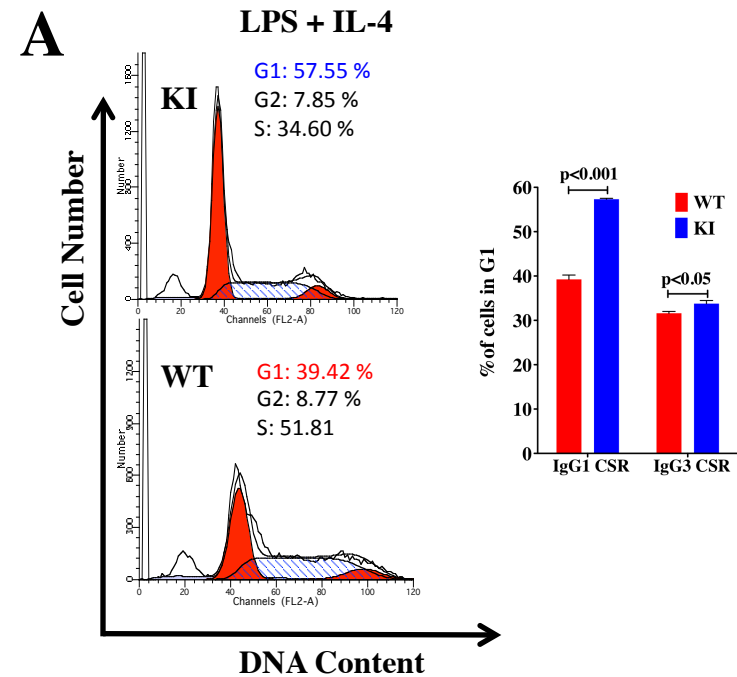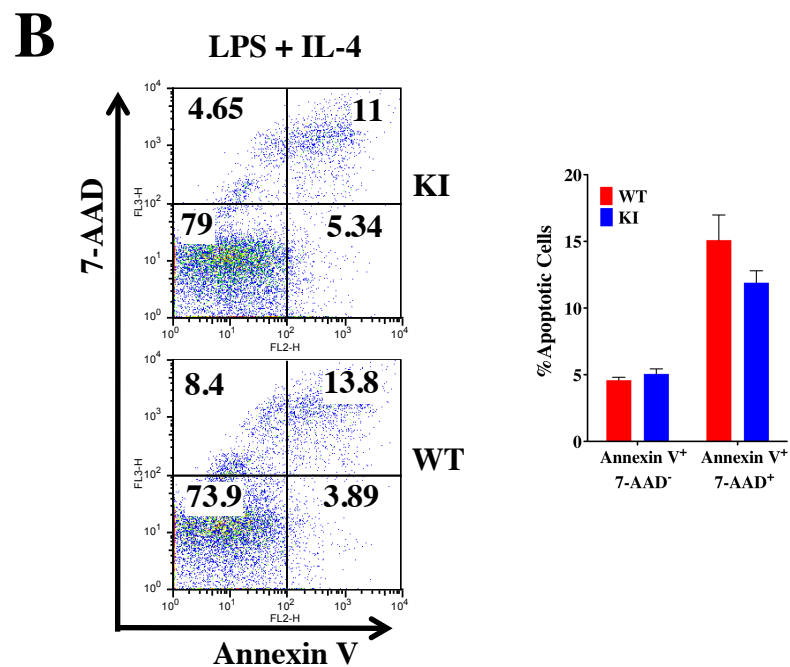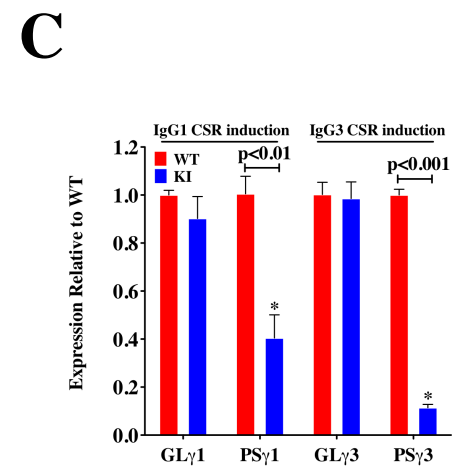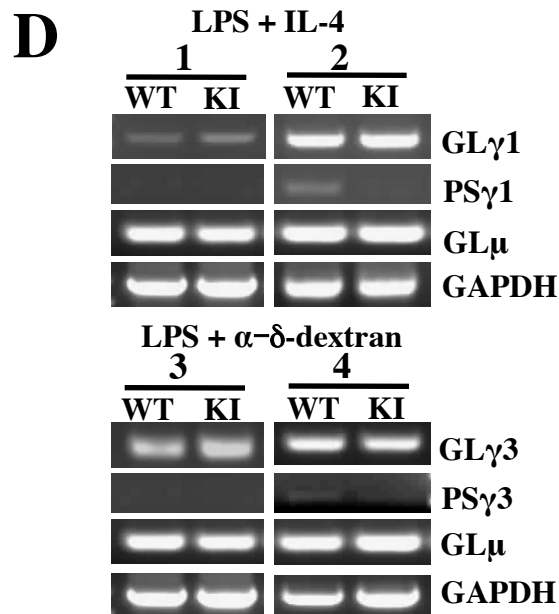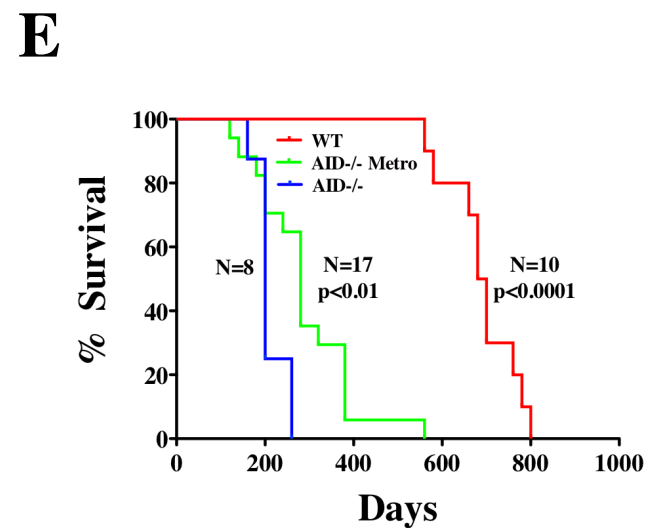

**Figure S4. Constitutive reductions in mTOR affect cell cycle, apoptosis and post switch transcripts in IgG<sub>1</sub> positive B cells.** CD43<sup>-</sup> resting B cells purified from spleens of KI and WT mice (N=3/group) were stimulated with LPS and IL4 (IgG<sub>1</sub> induction) or LPS and  $\alpha$ - $\delta$ -dextran (IgG<sub>3</sub> induction) for 48 hours. Cells were stained with PI for cell cycle analysis (**A**) and annexin V and 7-AAD for apoptosis (**B**). Stained cells were analyzed by FACS using FlowJo and ModFit LT. Data are presented as mean  $\pm$  SEM; significance p-values are indicated. Constitutive reductions in mTOR decrease post switch transcripts of IgG<sub>1</sub> and IgG<sub>3</sub> after CSR induction. **C, D**) Real-time and RT-PCR of germline (GL, containing I and C<sub>H</sub> exons of isotype) and post-switch transcripts (PS, containing I $\mu$  and each of C<sub>H</sub> exons). RT-PCR of germline and post-switch transcripts from CD43<sup>-</sup> resting B cells from spleens of WT or KI control (panels 1,3) or stimulated with LPS and IL4 (IgG<sub>1</sub> induction) (panel 2) or stimulated with LPS and  $\alpha$ - $\delta$ -dextran (IgG<sub>3</sub> induction) (panel 4) for 48h. The results (**C**) are displayed as relative fold changes of mRNA expression in KI compared with WT, upon normalization by 18S RNA (n = 3). Statistically significant changes were analyzed for WT compared with KI, Student's t-test. Data are presented as mean  $\pm$  SEM; p-values are indicated. **E**) The survival of AID KO mice in non-SPF conditions. Survival curves for 10 wild-type (red), 8 AID KO (blue) and 17 AID KO (green) mice given metronidazole and maintained in filter-top cages. Significance values are based on Log-rank (Mantel-Cox)  $\chi^2$  values.
